# Supplementary material
Source: PubMed Central journal article supplement (PMC3023494)
Supplement: supp_M110.148486_jbc.M110.148486-1.pdf [file supp_M110.148486_jbc.M110.148486-1.pdf]

#### SUPPLEMENTAL FIGURE LEGEND

SUPPLEMENTAL FIGURE S1. **Competition assay of the PRMT5 complex with GST-RioK1, GST-pICln and GST.** The PRMT5 complex was immunoprecipitated with anti-WD45/MEP50 antibodies from HeLa cell extract. The purified complex was incubated with increasing amounts (0.1 to 10  $\mu$ g) of GST-tagged RioK1 (AA1-242, lanes 2-4), pICln (lanes 5-7) or GST (lanes 9-11). The complex composition was afterwards analyzed by silver staining.

SUPPLEMENTAL FIGURE S2. **Identification of RioK1-interacting proteins.** Immunoprecipitation from HeLa extract with anti-RioK1 antibody (lane 2) or NRS (lane 3). The immunoprecipitates were washed extensively, resolved by SDS-PAGE, Coomassie stained and the marked bands were analyzed by mass spectrometry.

Supplemental Figure S1

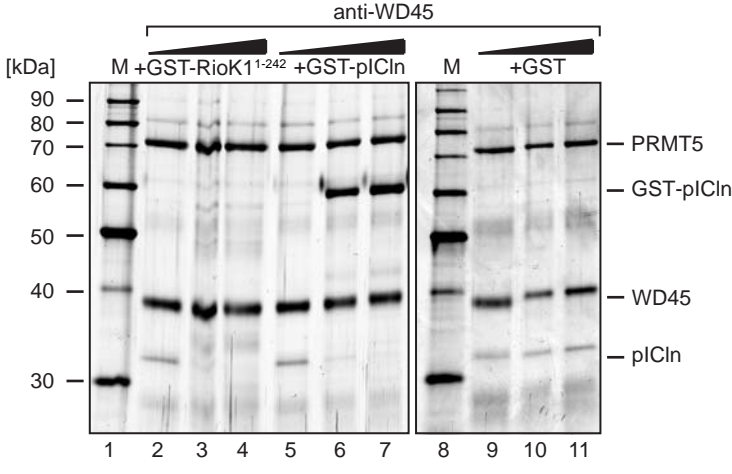

Supplemental Figure S2

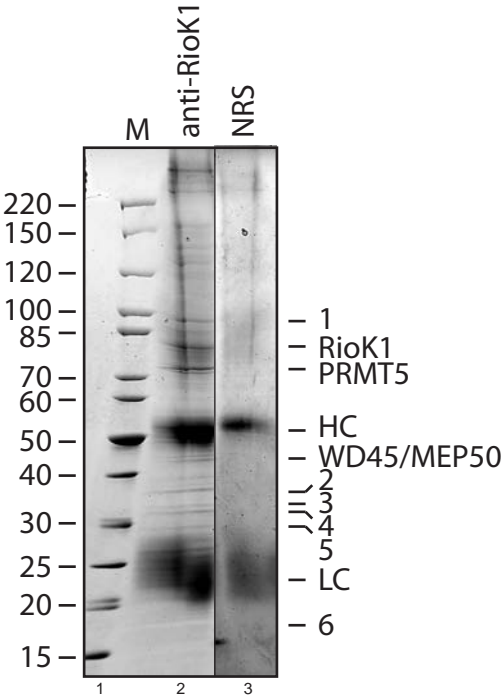

## SUPPLEMENTAL TABLE LEGEND

SUPPLEMENTAL TABLE S1. **List of putative RioK1-interacting proteins.** Proteins identified in Fig. S1 and from a pull-down in HeLa extract with GST-tagged truncated RioK1 (AA 450-568), covalently crosslinked to GSH-sepharose are listed alphabetically. Putative methylated RG-motives are in bold letters. Information about DNA-and RNA-binding capacity of proteins was derived from UniProtKB/Swiss-Prot database. Corresponding UniProtKB/Swiss protein accounts are listed in the last column.

| protein                                              | short | sequence-ID | DNA-binding | RNA-binding | putative RG-motive                                                                                  |
|------------------------------------------------------|-------|-------------|-------------|-------------|-----------------------------------------------------------------------------------------------------|
| 116 kDa U5 small nuclear ribonucleoprotein component | U5S1  | Q15029      | -           | -           | FTEQERGVGIKS, TITEPRGNEEAQ, QEPLHRGGQII, VLARRRGHVTQD                                               |
| 26S protease regulatory subunit 4                    | PRS4  | P62191      | -           | -           | KVDDLRTGTPMSV, DGFDSRGGDVKVI                                                                        |
| 26S proteasome non-ATPase regulatory subunit 3       | PSMD3 | Q43242      | -           | -           | GSARRRGADKAK                                                                                        |
| 28S ribosomal protein S7, mitochondrial precursor    | RT07  | Q9Y2R9      | -           | +           | AVKVARGWISGLA                                                                                       |
| 28S ribosomal protein S9, mitochondrial precursor    | RT09  | P82933      | -           | -           | LLLWGRGSLARK                                                                                        |
| 3' histone mRNA exonuclease 1                        | THEX1 | Q8IV48      | -           | +           | FKLETRGVKVDVL                                                                                       |
| 39S ribosomal protein S4, mitochondrial precursor    | RM54  | Q6P161      | -           | -           | -                                                                                                   |
| 39S ribosomal protein L1, mitochondrial precursor    | RM01  | Q9BYD6      | -           | +           | -                                                                                                   |
| 39S ribosomal protein L11, mitochondrial precursor   | RM11  | Q9Y3B7      | -           | -           | LGRAARGLRKPKE, PVLGQRGVSINQ                                                                         |
| 39S ribosomal protein L19, mitochondrial precursor   | RM19  | P49406      | -           | -           | EFIPRRGRDTPD, IQRSGRGLGATF                                                                          |
| 39S ribosomal protein L22, mitochondrial precursor   | RM22  | Q9NWU5      | -           | -           | HNLRSRGLALG, LAKLIRGMSIDQ, ESTSGRGQCLKR, IRYHGRGRFGIM                                               |
| 39S ribosomal protein L38, mitochondrial precursor   | RM38  | Q96DV4      | -           | -           | ECRRWRGFSTSA, PFPARGSGIHR                                                                           |
| 3-ketoacyl-CoA thiolase, mitochondrial               | THIM  | P42765      | -           | -           | MALLRGVVFVA, HELRRRGKGYAV                                                                           |
| 40S ribosomal protein S10                            | RS10  | P46783      | -           | -           | QSLKSRGYVKEQ, PARLTRGEADRD, TEFQFRGGFGRGRGQPP                                                       |
| 40S ribosomal protein S11                            | RS11  | P62280      | -           | +           | GNVSIRGRILSG                                                                                        |
| 40S ribosomal protein S13                            | RS13  | P62277      | -           | +           | -                                                                                                   |
| 40S ribosomal protein S14                            | RS14  | P62263      | -           | +           | RKGGRRGR                                                                                            |
| 40S ribosomal protein S15                            | RS15  | P62841      | +           | -           | RKFTYRGVDLDQ, RRRLNRGLRRKQ                                                                          |
| 40S ribosomal protein S15a                           | RS15A | P62244      | -           | +           | NNAEKRGKRQVL                                                                                        |
| 40S ribosomal protein S16                            | RS16  | P62249      | -           | +           | VAHCKRGNGLIK                                                                                        |
| 40S ribosomal protein S17                            | RS17  | P08708      | -           | -           | MKRIQRGPPVRSIKL, NFKTPRGP                                                                           |
| 40S ribosomal protein S18                            | RS18  | P62269      | -           | +           | KIRAHRLRHFV, WGLRVRGQHTKT, KTTGRRGRTVGV                                                             |
| 40S ribosomal protein S19                            | RS19  | P39019      | -           | +           | RHLYLRGGAGVG, PSFHSRGSKVA                                                                           |
| 40S ribosomal protein S2                             | RS2   | P15880      | -           | +           | PGMGNRGGFRGGFGSG, FGSGIRGRGRGRGRGRGRGARGKAED, VATAIRGAILA, IVPVRRGYWGNK, LIPAPRGTGIVS, CYTSARGCTATL |
| 40S ribosomal protein S20                            | RS20  | P60866      | -           | +           | CADLIRGAKEKN                                                                                        |
| 40S ribosomal protein S23                            | RS23  | P62266      | -           | -           | MGKCRGLRTAR                                                                                         |
| 40S ribosomal protein S25                            | RS25  | P62851      | -           | +           | ERLKIRGLARA                                                                                         |
| 40S ribosomal protein S27a                           | RS27A | P62979      | -           | -           | -                                                                                                   |
| 40S ribosomal protein S3                             | RS3   | P23396      | +           | +           | EKVATRGLCAIA, VSGKLRGQRAKS                                                                          |
| 40S ribosomal protein S3a                            | RS3A  | P61247      | -           | +           | -                                                                                                   |
| 40S ribosomal protein S4, X isoform                  | RS4X  | P62701      | -           | +           | MARGPKKHL, WISLPRGKIGRL                                                                             |
| 40S ribosomal protein S5                             | RS5   | P46782      | -           | +           | -                                                                                                   |
| 40S ribosomal protein S6                             | RS6   | P62753      | -           | -           | KRKSVRGCIVDA                                                                                        |
| 40S ribosomal protein S7                             | RS7   | P62081      | -           | +           | -                                                                                                   |
| 40S ribosomal protein S8                             | RS8   | P62241      | -           | -           | HTVRVRRGNKKY                                                                                        |
| 40S ribosomal protein S9                             | RS9   | P46781      | -           | +           | -                                                                                                   |
| 40S ribosomal protein SA                             | RSSA  | P08865      | -           | -           | EVLRMRTISRE                                                                                         |
| 5'-3' exonuclease 1                                  | XRN1  | Q8IZH2      | +           | +           | KMNQQRGRRFRS, FQSSRGENMML, SIFIGRGSRRNP, VPVGLRGTIIGI, RCSPGRGYRLPT                                 |
| 60 kDa heat shock protein, mitochondrial precursor   | CH60  | P10809      | -           | -           | PVEIRRGVMLAV; GMKFDRGYISPY                                                                          |
| 60S acidic ribosomal protein P0                      | RLA0  | P05388      | -           | +           | IRMSLRGKAVVL, MRKAIRGHLENN, LLPHIRGNVGFV, TTKISRGTIEIL                                              |
| 60S acidic ribosomal protein P2                      | RLA2  | P05387      | -           | +           | -                                                                                                   |
| 60S ribosomal protein L10                            | RL10  | P27635      | -           | -           | KSRFCRGPVDAK, LQTGMRGAFGKP, KYIPNRGPLDKW                                                            |
| 60S ribosomal protein L10a                           | RL10A | P62906      | -           | +           | -                                                                                                   |
| 60S ribosomal protein L10-like                       | RL10L | Q96L21      | -           | -           | KSRFCRGPVDAK, LQTGMRGAFGKP                                                                          |
| 60S ribosomal protein L11                            | RL11  | P62913      | -           | +           | VHCTVRGAKAEE                                                                                        |
| 60S ribosomal protein L12                            | RL12  | P30050      | -           | +           | -                                                                                                   |
| 60S ribosomal protein L13                            | RL13  | P26373      | -           | +           | KVRAGRGSLEE                                                                                         |
| 60S ribosomal protein L13a                           | RL13A | P40429      | -           | -           | LVLDGRGHLLGR, NTNPSRGPYHFR, FWRTVRGMLPHK, PHKTKRGQAALD                                              |
| 60S ribosomal protein L14                            | RL14  | P50914      | -           | +           | -                                                                                                   |
| 60S ribosomal protein L17                            | RL17  | P18621      | -           | -           | KSCKSRGSNLRV                                                                                        |
| 60S ribosomal protein L18                            | RL18  | Q07020      | -           | +           | KFERARGRRASRGYK                                                                                     |
| 60S ribosomal protein L18a                           | RL18A | Q02543      | -           | +           | -                                                                                                   |
| 60S ribosomal protein L19                            | RL19  | P84098      | -           | +           | -                                                                                                   |
| 60S ribosomal protein L21                            | RL21  | P46778      | -           | +           | TKGKRRTRYMF                                                                                         |
| 60S ribosomal protein L22                            | RL22  | P35268      | -           | +           | -                                                                                                   |
| 60S ribosomal protein L23                            | RL23  | P62829      | -           | -           | MSKRGRGGSSGA                                                                                        |
| 60S ribosomal protein L23a                           | RL23A | P62750      | -           | +           | -                                                                                                   |
| 60S ribosomal protein L24                            | RL24  | P83731      | -           | +           | -                                                                                                   |

|                                                       |       |        |   |   |                                                                                                                                          |
|-------------------------------------------------------|-------|--------|---|---|------------------------------------------------------------------------------------------------------------------------------------------|
| 60S ribosomal protein L24                             | RS24  | P83731 | - | + | -                                                                                                                                        |
| 60S ribosomal protein L26                             | RL26  | P61254 | - | + | EVQVVRGHYKGG                                                                                                                             |
| 60S ribosomal protein L26-like 1                      | RL26L | Q9UNX3 | - | - | EVQVVRGHYKGG                                                                                                                             |
| 60S ribosomal protein L27a                            | RL27A | P46776 | - | + | KTRKLRGHVSHG, KHPGGGRNAGGL                                                                                                               |
| 60S ribosomal protein L28                             | RL28  | P46779 | - | + | -                                                                                                                                        |
| 60S ribosomal protein L29                             | RL29  | P47914 | - | + | -                                                                                                                                        |
| 60S ribosomal protein L3                              | RL3   | P39023 | - | + | RSSRHRGKVKSF, YVETPRGLRFTK, PRKTHRGLRKA                                                                                                  |
| 60S ribosomal protein L30                             | RL30  | P62888 | - | + | -                                                                                                                                        |
| 60S ribosomal protein L31                             | RL31  | P62899 | - | + | -                                                                                                                                        |
| 60S ribosomal protein L32                             | RL32  | P62910 | - | - | NWRKPRGIDNRV                                                                                                                             |
| 60S ribosomal protein L35                             | RL35  | P42766 | - | + | KARDLRGKKKEE                                                                                                                             |
| 60S ribosomal protein L36                             | RL36  | Q9Y3U8 | - | - | RHSRRRGLRCLKH                                                                                                                            |
| 60S ribosomal protein L36a                            | RL36A | P83881 | - | - | -                                                                                                                                        |
| 60S ribosomal protein L36a-like                       | RL36L | Q969Q0 | - | - | -                                                                                                                                        |
| 60S ribosomal protein L38                             | RL38  | P63173 | - | + | -                                                                                                                                        |
| 60S ribosomal protein L4                              | RL4   | P36578 | - | + | RIPRVRRGGGTHR, FGNMCRGGRMFA, RRIQRGPCIY                                                                                                  |
| 60S ribosomal protein L5                              | RL5   | P46777 | - | - | -                                                                                                                                        |
| 60S ribosomal protein L6                              | RL6   | Q02878 | + | + | NPVLRVIGRYS, LTGRHRGKRVVF                                                                                                                |
| 60S ribosomal protein L7                              | RL7   | P18124 | + | + | FVIRIRGINGVS, ELIYKRGYKIN, KLSSPRGGMKKK                                                                                                  |
| 60S ribosomal protein L7a                             | RL7A  | P62424 | - | + | -                                                                                                                                        |
| 60S ribosomal protein L8                              | RL8   | P62917 | - | + | MGRVIRGQRKGA, IHDPRGAPLAK, EKPGDRGKLARA, CWPRVRGVAMNP, RTGRLRGTKTVQ                                                                      |
| 6-phosphofructokinase type C                          | K6PP  | Q01813 | - | - | CNLLQRGITNLC, LGHVQRGGTPSA, DAVRLRGRSFAG, KTTIQRGLVLRN, KLKEARGRGKFTT                                                                    |
| 78 kDa glucose-regulated protein precursor            | GRP78 | P11021 | - | - | GKEPSRGINPDE, IPPAPRGVPQIE                                                                                                               |
| Actin, cytoplasmic 1                                  | ACTB  | P60709 | - | - | EAQSKRGILTLL, KILTERGYSFTT                                                                                                               |
| Actin, cytoplasmic 2                                  | ACTG  | P63261 | - | - | EAQSKRGILTLL, KILTERGYSFTT                                                                                                               |
| Activator of basal transcription 1                    | ABT1  | Q9ULW3 | + | + | LQSVERGQFLA                                                                                                                              |
| Alpha-centractin                                      | ACTZ  | P61163 | - | - | KAEHRGLLSIR                                                                                                                              |
| Alpha-enolase                                         | ENOA  | P06733 | + | - | EIFDSRGNPTVE                                                                                                                             |
| AP-1 complex subunit mu-1                             | AP1M1 | Q9BXS5 | - | - | CRNYRGDVDMS, FDNTGRGKSKS                                                                                                                 |
| AP-2 complex subunit mu-1                             | AP2M1 | Q96CW1 | - | - | -                                                                                                                                        |
| Arginyl-tRNA synthetase, cytoplasmic                  | SYRC  | P54136 | - | - | VSLIERGESFYQ, KEFEDRGFVQVD, KMLDDRGNNTAA                                                                                                 |
| Aspartyl-tRNA synthetase, cytoplasmic                 | SYDC  | P14868 | + | + | YDMFMRGEEILS                                                                                                                             |
| ATP synthase subunit alpha, mitochondrial precursor   | ATPA  | P25705 | - | - | SLVPIGRGQRELI, QQLSRGVRLTE, IYAGVRGYLDKL                                                                                                 |
| ATP-binding cassette sub-family F member 1            | ABCF1 | Q8NE71 | - | + | PAPKPRGGKTK; TEYLQRGFNLPI                                                                                                                |
| ATP-citrate synthase                                  | ACYL  | P53396 | - | - | QLIKRRGKLG, TIFVRRGGPNYQ, EYKICRGIKEGR, SICDERGQELIY                                                                                     |
| ATP-dependent RNA helicase A                          | DHX9  | Q08211 | - | + | GPTWDRGANLKD, SVVIIRGATGCG, RVAFERGEEPGK, LEAGIRGISHVI, GSGYRRGGSSYS, VGGYRGVSRGGFRGNSGGD, SGGDYRGPSSGGYRSGGFQRRGGGRGAYGTG, YFGQGRGGGG   |
| ATP-dependent RNA helicase DDX1                       | DDX1  | Q92499 | - | + | MNPYDRGSFAFI, TDVAARGIDIHG, HVCSSRGKGCYN                                                                                                 |
| ATP-dependent RNA helicase DDX3X                      | DDX3X | O00571 | - | + | SRSDSRGKSSFF, SFFSDRGSGRGRFDDRGRSDYD, DGISSRGRSGF, FGKFERGGNSRW, IRDLERGCHLLV, VDMMERGKIGLD, TAVAARGLDISN, YKGSSRGRSKSS, GHGSSRFGGGGG    |
| ATP-dependent RNA helicase DDX3Y                      | DDX3Y | O15523 | - | + | GSRDSRGKPGYF, GYFSEGRSGRGRFDDRGRSDYD, IRDLERGCHLLV, VDMMERGKIGLD, TAVAARGLDISN, YKGSSRGRSKSN, GFGASRGSSSRS, GYGNSRFGGGGG                 |
| ATP-dependent RNA helicase DDX50                      | DDX50 | Q9BQ39 | - | + | KLLKGRGVTYLF, TNVAARGLDIPE, YQPRERGLRYV                                                                                                  |
| ATP-dependent RNA helicase DDX54                      | DDX54 | Q8TDD1 | - | + | GLRKRGAASQARSDSED, TDLAARGLDIPL, ASLELRGLARVA, RSGPNRGAKRNR, DFDSEGLSISG, AQLNTRGRQQLK, GASDRRGPERRGGKRDGQASR, LHFLQRGLKQL, QGAFGRGARSKK |
| ATP-dependent RNA helicase DDX55                      | DDX55 | Q8NHQ9 | - | + | TDVMARGIDIPE, FASLARGFALLR, KMPELRGKQFPD                                                                                                 |
| BAG family molecular chaperone regulator 1            | BAG1  | Q99933 | - | - | MAQRGGARRPRGDRERL, EPPAQRGPPPSR, HDRPTRGAAAGA                                                                                            |
| Beta-centractin                                       | ACTY  | P42025 | - | - | KAEHRGLLTI                                                                                                                               |
| Bifunctional aminoacyl-tRNA synthetase                | SYEP  | P07814 | - | + | RFPTVRGLRRGMTVEG, IQLQRRGFICD                                                                                                            |
| Brix domain-containing protein 2                      | BXDC2 | Q8TDN6 | - | - | TKRKRGGFAVQ, LIFSSRGINFRT                                                                                                                |
| Bystin                                                | BYST  | Q13895 | - | - | KFKAARGVGGQE, VREKRGRGTGEA, VLEVYRGVREVL                                                                                                 |
| CAD protein                                           | PYR1  | P27708 | - | - | DGSVLRGQPFGA, RCLCQRGAETV, MRYGNRGNQPC, LLEQHRGQPLPP, INLSMRGAGGRR, KAAKARGLPVT, RRVVLRGEVAYI, PERPRRGIPGLP, AFVASRGTKQEE                |
| Carbamoyl-phosphate synthase [ammonia]                | CPSM  | P31327 | - | - | RLLVKRGAEVHL, MSMANRGNQPV, VELFKRGVLKEY                                                                                                  |
| Carbonyl reductase [NADPH] 1                          | CBR1  | P16152 | - | - | ARDVTRGQAAVQ                                                                                                                             |
| Carbonyl reductase [NADPH] 3                          | CBR3  | O75828 | - | - | VTGANRIGLAI, ARDVARGQAAVQ                                                                                                                |
| Cell division cycle 5-like protein                    | CDC5L | Q99459 | + | + | KRKRKRGVDYNA                                                                                                                             |
| Cell growth-regulating nucleolar protein              | LYAR  | Q9NX58 | - | - | -                                                                                                                                        |
| Chromodomain helicase-DNA-binding protein3            | CHD3  | Q12873 | + | - | VKKRKRGPKKQK, GRKKLRGKMAP, TKKLRGRPRGR, EALNSRGGGNQV, VRDLRGKTEKE, PEPGYRGDREKS, STPGERGEKPL                                             |
| Cisplatin resistance-associated overexpressed protein | CROP  | Q86Y74 | - | - | ERRIRRGHARLA                                                                                                                             |
| Clathrin heavy chain 1                                | CLH1  | Q00610 | - | - | FCFAVRGQAGGK, LILVRRGQF, CVAYERGQCDLE, NYYQDRGYFEEL                                                                                      |
| Cleavage and polyadenylation specificity factor 7     | CPSF7 | Q8N684 | - | + | CVRVPRGGIPPR                                                                                                                             |

|                                                                          |       |        |   |   |                                                                                                                                                                                                                                                      |
|--------------------------------------------------------------------------|-------|--------|---|---|------------------------------------------------------------------------------------------------------------------------------------------------------------------------------------------------------------------------------------------------------|
| Coatamer subunit delta                                                   | COPD  | P48444 | - | - | -                                                                                                                                                                                                                                                    |
| Coiled-coil domain-containing protein 86                                 | CCD86 | Q9H6F5 | - | - | -                                                                                                                                                                                                                                                    |
| Cold shock domain-containing protein E1                                  | CSDE1 | O75534 | + | + | FGFIERGDVVE, VLRQPRGPDNSM                                                                                                                                                                                                                            |
| Complement component 1 Q subcomponent-binding protein                    | C1QB  | Q07021 | - | - | GLLRPRGPCACG, DFLADRGVDTNF                                                                                                                                                                                                                           |
| Core histone macro-H2A.1                                                 | H2AY  | O75367 | + | - | MSSRGGKKKS, LLAKKRGSKGL                                                                                                                                                                                                                              |
| Crossover junction endonuclease MUS81                                    | MUS81 | Q96NY9 | + | - | DIGETRGGGHRP, LALLTRGLQRLY, QLMQVRGVSGEK                                                                                                                                                                                                             |
| Cullin-associated NEDD8-dissociated protein 1                            | CAND1 | Q86VP6 | - | - | -                                                                                                                                                                                                                                                    |
| D-3-phosphoglycerate dehydrogenase                                       | SERA  | O43175 | - | - | VVNCARGGIVDE                                                                                                                                                                                                                                         |
| Developmentally-regulated GTP-binding protein 1                          | DRG1  | Q9Y295 | - | - | KDGKGRGRQVIA                                                                                                                                                                                                                                         |
| DNA mismatch repair protein MSH6                                         | MSH6  | P52701 | + | - | DDSPTRGWWVSKR, LANYSRGGDGM, VDELGRGTATFD                                                                                                                                                                                                             |
| DNA polymerase delta catalytic subunit                                   | DPOD1 | P28340 | + | - | PPKRARGGLWDD, GPPPSRGSVPVL, ISRDSRGGRELT, SYLLSRGQQVKV, EAVLLRGDHTRC                                                                                                                                                                                 |
| DNA replication licensing factor MCM3                                    | MCM3  | P25205 | + | - | NGSHIRGDINIL, IPTTGRGSSGVG, MVLADRGVVICD                                                                                                                                                                                                             |
| DNA replication licensing factor MCM6                                    | MCM6  | Q14566 | + | - | QAEPRGSIPRS, ETEGIRGLRALG, NDEVKRGVLLML, EGTSLRGDINVC                                                                                                                                                                                                |
| DNA-binding protein A                                                    | DBPA  | P16989 | + | + | RRRYRRGYGRRRGPPRNY, PRYSRGGPPRPR, QPSVRRGYRRPY                                                                                                                                                                                                       |
| DNA-dependent protein kinase catalytic subunit                           | PRKDC | P78527 | + | - | GHQLIRGLGQEC, LSAIRGYGLFA, KRRLPRGFPPSA, TLLYLGRPFSLQ, RRIARRGSCVTO, PAKRVRGKARLP, EYDVLRGIFTSE, GOYDGRGKPLPE, KRIIRRHDERE, YVAVARGSKDHN                                                                                                             |
| DNA-directed RNA polymerase III subunit RPC2                             | RPC2  | Q9NW08 | + | - | DIEYTRGSQRII, KASLDRGFGRCL, MHARARGPRAVL                                                                                                                                                                                                             |
| DNA-directed RNA polymerases I and III subunit RPAC1                     | RPAC1 | O15160 | + | - | -                                                                                                                                                                                                                                                    |
| DnaJ homolog subfamily A member 1                                        | DNJA1 | P31689 | - | - | MQRERRGKNVVH, DKCEGRGKKGA, CCPNCRGTGMQI, AVFTRRGEDLFM, DEHHPRGGVQCC                                                                                                                                                                                  |
| DnaJ homolog subfamily C member 9                                        | DNJC9 | Q8WXX5 | - | - | DGEVRRGYHKVS                                                                                                                                                                                                                                         |
| Double-stranded RNA-binding protein Staufen homolog 2                    | STAU2 | Q9NUL3 | - | + | KLNERGPAHSK, GLAMKRGEPAIY, ANYNFRGMYNQR, VLLSERGMPPRR                                                                                                                                                                                                |
| Dynein heavy chain, cytosolic                                            | DYHC  | Q14204 | - | - | KQCYERGEKPKV, VRPHIRGAIREY, ESTRVGRGTGNV, QIRKARFTDNA, KCRLIRGWDDL, REKEERGEAVDE, GVQYHRGEMTAL, IIDSVRGELQKR, MTRVWRGIFEAL, ARLAKRGGRTMA, FNRVARGMLHQD, FQHFLRGNEIVL, RSFYERGVAVLC                                                                   |
| Elongation factor 1-alpha 1                                              | EF1A1 | P68104 | - | - | KAERERGITIDI, VKDVRRGNAVGD                                                                                                                                                                                                                           |
| Elongation factor Tu, mitochondrial precursor                            | EFTU  | P49411 | - | - | LPLLCRGLAVEA, PEERARGITINA, YSVPRGTVVTG, TGTLERGILKKG, LGALVRGLKRED, REDLRRGLVMVK                                                                                                                                                                    |
| ESF1 homolog                                                             | ESF1  | Q9H501 | - | - | YAVDKRGRPISH, GPDLARGKNIE                                                                                                                                                                                                                            |
| Eukaryotic initiation factor 4A-I                                        | IF4A1 | P60842 | - | + | SELLRGIYAYG, DEMLSRGFKDOI, TDLARGIDVQQ, IHRIGRGGRRFR                                                                                                                                                                                                 |
| Eukaryotic translation initiation factor 2 subunit 1                     | IF2A  | P05198 | - | + | KIEEKRGVFNVQ                                                                                                                                                                                                                                         |
| Eukaryotic translation initiation factor 2 subunit 2                     | IF2B  | P20042 | - | + | -                                                                                                                                                                                                                                                    |
| Eukaryotic translation initiation factor 2 subunit 3                     | IF2G  | P41091 | - | - | WGQIRRGVTIKP                                                                                                                                                                                                                                         |
| Eukaryotic translation initiation factor 2C 2                            | I2C2  | Q9UKV8 | - | - | -                                                                                                                                                                                                                                                    |
| Eukaryotic translation initiation factor 3 subunit 10                    | IF3A  | Q14152 | - | - | DSEWRRGPPEKE, EKEWRRGEGRDE, DRVPRGMDDDRGPRRGPEEDR, DRFSRRGADDDR, IADEDNWNRHA, DRPPRRGLDEDRGSRWTA, TADEDRGRPRGMDDDRGPRRGADDE, NADDDRGRPRGLDDDRGPRGMDDDRGPRRGDDDRGPRRGDDDRGPRRGDDDRGPRRWNA, DRIPRRAEDDRGPWRNM, DRFPRRGDDSRP, EGGWRRGPAEES, DDRDRRGPLRS |
| Eukaryotic translation initiation factor 3 subunit 6                     | IF36  | P60228 | - | - | -                                                                                                                                                                                                                                                    |
| Eukaryotic translation initiation factor 3 subunit 6-interacting protein | IF3I  | Q9Y262 | - | - | -                                                                                                                                                                                                                                                    |
| Exosome component 10                                                     | EXOSX | Q01780 | - | + | LEMWERGNGQPV, TGKSDRGFRYNW                                                                                                                                                                                                                           |
| Exportin-2                                                               | XPO2  | P55060 | - | - | ACDLVRGLCKFF, RLFTMRGPNAT, QAFLEGSNTIA                                                                                                                                                                                                               |
| Exportin-T                                                               | XPOT  | O43592 | - | + | VDLNPRGVLDYL, AFLDHRGLRHSS, TIHLKRGPECVQ                                                                                                                                                                                                             |
| FACT complex subunit SPT16                                               | SPT16 | Q9Y5B9 | - | - | EDLLGRGSRAAL, RFTSVRGDKVDI, VHSSGRGNSRGRSHSS                                                                                                                                                                                                         |
| Fatty acid synthase                                                      | FAS   | P49327 | - | - | NPDSLRTHTGV, FFFDFRGPISAL, QPLPVRGGNVI, TAMPPFRGYAVLG, VLGGERRGPEVQ, MGTQWRGMGLSL, LAAYWRGQCIKE, QAVLKRGLKPSK, EFPAPRGTP LIS, KELRLRGYDYG, LHTLLRGHPLGD, VSTLTRGDLSSI, YALVVRGRVPRG, QWLIQRGVQKLV, SLEGARGLIAEA, SVSCGRGNAGQS                        |
| FilaminA                                                                 | FLNA  | P21333 | - | - | PQLEARGDSTYR, CRAVGRGLQPKG, DRVKARGPGLK, VKYTPRGAGSYT, TYVQDRGDGMYK, FTVETRGAGTGG                                                                                                                                                                    |
| G patch domain-containing protein 4                                      | GPTC4 | Q5T310 | + | + | PEVKSRRGMKFAE, LNLEDRGEETVL, TGSSSRGKRKRQ                                                                                                                                                                                                            |
| GCN1-like protein 1                                                      | GCN1L | Q92616 | - | - | MLASYRGDTLLQ, RETVLRGLMELH, LQDSNRGVRLKA, AVSGVRGMGFLM                                                                                                                                                                                               |
| GC-rich sequence DNA-binding factor homolog                              | GCFC  | Q9Y5B6 | + | - | FLQEMRGYVQDL                                                                                                                                                                                                                                         |
| General transcription factor II-I                                        | GTF2I | P78347 | + | - | VVGTERGRAFVN, LERIVRGSNKIK, VPFKPRGREFSF                                                                                                                                                                                                             |
| Glutamate-rich WD repeat-containing protein 1                            | GRWD1 | Q9BQ67 | - | - | VYLPGRGPPLRE                                                                                                                                                                                                                                         |
| Glutamyl-tRNA synthetase                                                 | SYQ   | P47897 | - | - | LMEQLRGEALFK, VELIRRGGLAYVC, YVCHQRGEELKG, TALRRRGFPPEA                                                                                                                                                                                              |
| Glutathione S-transferase Mu 3                                           | GSTM3 | P21266 | - | - | GYWDIRGLAHA                                                                                                                                                                                                                                          |
| Glyceroldehyde-3-phosphate dehydrogenase                                 | G3P   | P04406 | - | - | LWRDGRGALQNI                                                                                                                                                                                                                                         |
| G-rich sequence factor 1                                                 | GRSF1 | Q12849 | - | + | LGALLRGCNC, AASQTRGLQTP, RDGKRRGDALIE, GVVRLRGLPYSC, FMVDYRGRRTKG, HFVHMRGLPFQA                                                                                                                                                                      |
| Guanine nucleotide-binding protein subunit beta 2-like 1                 | GBLP  | P63244 | - | - | EQMTLRGTLKGH, PQRALRGHSHFV                                                                                                                                                                                                                           |
| Guanine nucleotide-binding protein-like 3                                | GNL3  | Q9BVP2 | - | - | KEAKKRGHKKPR, VLAQRGMHQKG                                                                                                                                                                                                                            |
| H/ACA ribonucleoprotein complex subunit 4                                | DKC1  | O60832 | - | + | -                                                                                                                                                                                                                                                    |
| Heat shock 70 kDa protein 1                                              | HSP71 | P08107 | - | - | IPPAPRGVPQIE                                                                                                                                                                                                                                         |
| Heat shock 70 kDa protein 1L                                             | HS71L | P34931 | - | - | CADLFRGTLEPV, IPPAPRGVPQIE                                                                                                                                                                                                                           |
| Heat shock 70 kDa protein 6                                              | HSP76 | P17066 | - | - | VRVCYRGEDKTF, YGLDRRGAGERN, IPPAPRGVPQIE                                                                                                                                                                                                             |
| Heat shock protein HSP 90-alpha                                          | HS90A | P07900 | - | - | GEPMGRGTVIL, YLNFIRGVVDSE                                                                                                                                                                                                                            |
| Heat shock protein HSP 90-beta                                           | HS90B | P08238 | - | - | GEPIGRGTVIL, YLNFIRGVVDSE, ERVRRKGFVVY                                                                                                                                                                                                               |
| Heterogeneous nuclear ribonucleoprotein A/B                              | ROAA  | Q99729 | - | + | VPEASRGRGWTGAA, NTRGSRGFGFIL, KLNKRGRVFVIT, YGSGGRNRRNRGRGSGGGG, GKSQRRGGHQNN                                                                                                                                                                        |

|                                                          |        |        |   |   |                                                                                                                                                                                        |
|----------------------------------------------------------|--------|--------|---|---|----------------------------------------------------------------------------------------------------------------------------------------------------------------------------------------|
| Heterogeneous nuclear ribonucleoprotein A0               | ROA0   | Q13151 | - | + | SESLRGLGHFEAF, QSGKKRGGFVFY, GSRSSRGGRRGGRRGGRRDQ, NSGPYRGGYGGG                                                                                                                        |
| Heterogeneous nuclear ribonucleoprotein A1               | ROA1   | P09651 | + | + | NTKRSRGGFVFT, EIMDRGSGKKRGFVFT, ASSSQRRSGSG, NFGGRRGGGFGG, NDNFRGGNFSGRGGFGGSRGGGGYG, YSGGSRGGYSGG                                                                                     |
| Heterogeneous nuclear ribonucleoprotein A3               | ROA3   | P51991 | - | + | RRRRRRGEEGHD, QTKRSRGGFVFT, QSGKKRGFVFT, SAGSQRRGGGSGN, GNFMGRGGNFGG, GGNFGRGGNFGGRRGGYGGG, GGGGSRGSGYGGG, PGYSSRGGYGGG                                                                |
| Heterogeneous nuclear ribonucleoprotein D0               | HNRPD  | Q14103 | + | + | ITGRSRGGFVFL, KTNKRGGFCFIT, QQWGSRGGFAGR, FAGRARGGGGPSQ, GKVSRRGGHQNS                                                                                                                  |
| Heterogeneous nuclear ribonucleoprotein D-like           | HNRDL  | O14979 | + | + | VTGRSRGGFVFL, KTNERGGFCFIT, QQKGGRGAAGGRGGTRGGRRGGQGNW, YGKASRGGGNHQ                                                                                                                   |
| Heterogeneous nuclear ribonucleoprotein F                | HNRPF  | P52597 | - | + | FVVKLRGLPWSC, GFVLRGLPFGC, HCVHMRGLPYKA                                                                                                                                                |
| Heterogeneous nuclear ribonucleoprotein G                | HNRPG  | P38159 | - | + | ETNKSRRGFVFT, FESGRGPPPPP, PPRSRRGPPRGLRGGRRGGSGGTRGPPSRGGHMDD, NMSSSRGPLPVKRGPPPRS, RAPVSRGRDSYG, DDYPSRGGYSDRD, SAPPTRGGPPSY, VGRQERGLPPSM, PPSMERGGYPPPR, YSSSSRGAAPGGGGGSRSDRGGGSR |
| Heterogeneous nuclear ribonucleoprotein H                | HNRH1  | P31943 | - | + | FVVKVRGLPWSC, GFVLRGLPFGC, RFGAGRGGYNSIGRGGAGFER, FERMRGGAYGGG, HCVHMRGLPYRA                                                                                                           |
| Heterogeneous nuclear ribonucleoprotein H'               | HNRH2  | P55795 | - | + | FVVKVRGLPWSC, GFVLRGLPFGC, RFGAGRGGYNSIGRGGAGFER, FERMRGGAYGGG, HCVHMRGLPYRA                                                                                                           |
| Heterogeneous nuclear ribonucleoprotein H3               | HNRH3  | P31942 | - | + | GTVLRGLPFGC, RPIGGRRGGYGA, YGAGRGGSMYDR, YDRMRGGDGYD, RMRDGRMGGGH, HFVHMRGLPFRA, LGGYRGGGGSG, SGGGWRGM                                                                                 |
| Heterogeneous nuclear ribonucleoprotein K                | HNRPK  | P61978 | + | + | MFDDRRGRPVGF, VGFPMRGGGFDRM, RMPGRGGRRPMP, DMSPRGGPPPPP, PPPPGRGGRRSRAR, PPPPRGGDLMA, MAYDRRGRPGDR, SYAGGRGGYGD                                                                        |
| Heterogeneous nuclear ribonucleoprotein M                | HNRPM  | P52272 | - | + | EKNIKRGGNRF, AEGKSRGCAVVE, KDGKSRGIGTVT, SNALKRGEIIAK, AIEMERGGFGGS                                                                                                                    |
| Heterogeneous nuclear ribonucleoprotein Q                | HNRPQ  | O60506 | - | + | LTGLNRGYAFVT, DKKKNRGGFCLE, MPPPTRGGRRGGGGYGY, DYHNYRGGYEDP, FQVGARGGRRGARGAAPSRRGAAPPRGRAGYS, AGYSQRGGPGSARGVRRGARGGAQQRRGGVRRGARGRRGGNVGG                                            |
| Heterogeneous nuclear ribonucleoprotein R                | HNRPR  | O43390 | - | + | LSGQNRGYAFIT, DKKKNRGGFCLE, VHFEDRGAAVKA, MPPPIRGGRRGGRRGGYGY, DYHNYRGGYEDP, DGYAVRGGGGRRGGRRGAPPPRRGGRRGAPPRGRAGYS, AGYSQRGAPLPG, PLGPPRRGGRRGGGPAQ, PAQQRRGGRRGGRRGGNVGG             |
| Heterogeneous nuclear ribonucleoprotein U                | HNRPU  | Q00839 | + | + | QPQQRGAKEA, GGDKKRGGVRRPR, REDHRRGGYFEYI, LEDRVRRGPKGPE, KNQFNRRGGHRRGGFNMRGGNFRGGAPGNRRGGYNNRGNMPPRRGGGGGG, PVFPGRGYSNRGGYNNRGGMPNRRGGYNNQ, YNQFNRRGGNRRGGYNNQ                        |
| Heterogeneous nuclear ribonucleoprotein U-like protein 1 | HNRL1  | Q9BUJ2 | - | + | EELQRRGLDRGLKAE, PYEENRRGGYFEHR, HREDRRGRSPQ, SYGVRGRVCFE, LSERIRGTGPK, KRFDNRGGGGRRGGGGGGF, QRYENRRGGNRRGGFQNRGGGGSG, GGGNYRGGFNRS, NNSNRRGYSNRA                                      |
| Heterogeneous nuclear ribonucleoprotein U-like protein 2 | HNRL2  | Q1KMD3 | - | + | SELQRRGLDSRGLKVDL, SDGERRGGVRRQR, YGFDGRGLKAEN, RQNRSRGGQYVG, VGGQRRGYDNRA, GQPNRRGGYRNF, FYDRYRGGYDRF                                                                                 |
| Heterogeneous nuclear ribonucleoproteins A2/B1           | ROA2   | P22626 | + | + | ASKRSRGGFVFT, QSGKKRGGFVFT, SSRSGRRGNFGF, GFGDSRGGGGNF, PGSNFRGGSDGY, GYGSRRGGFDGY, GYGGRRGGYGGG                                                                                       |
| Histone chaperone ASF1B                                  | ASF1B  | Q9NVP2 | - | - | -                                                                                                                                                                                      |
| Histone H1.0                                             | H10    | P07305 | + | + | -                                                                                                                                                                                      |
| Histone H1.2                                             | H1.2   | P16403 | + | - | -                                                                                                                                                                                      |
| Histone H1.3                                             | H1.3   | P16402 | + | - | -                                                                                                                                                                                      |
| Histone H1.4                                             | H1.4   | P10412 | + | - | -                                                                                                                                                                                      |
| Histone H1.5                                             | H1.5   | P16401 | + | - | -                                                                                                                                                                                      |
| Histone H1x                                              | H1X    | Q92522 | + | - | GGGERRGAPAAA, DKKPARGGQKPEQ                                                                                                                                                            |
| Histone H2A.Z                                            | H2AZ   | P0C0S5 | + | - | LQLAIRGDEELD                                                                                                                                                                           |
| Histone H2AV                                             | H2AV   | Q71U9  | + | - | LQLAIRGDEELD                                                                                                                                                                           |
| Histone H2B type 1-B                                     | H2B1B  | P33778 | + | - | -                                                                                                                                                                                      |
| Histone H2B type 1-C/E/F/G/I                             | H2B1C  | P62807 | + | - | -                                                                                                                                                                                      |
| Histone H2B type 1-D                                     | H2B1D  | P58876 | + | - | -                                                                                                                                                                                      |
| Histone H2B type 1-H                                     | H2B1H  | Q93079 | + | - | -                                                                                                                                                                                      |
| Histone H2B type 1-J                                     | H2B1J  | P06899 | + | - | -                                                                                                                                                                                      |
| Histone H2B type 1-K                                     | H2B1K  | O60814 | + | - | -                                                                                                                                                                                      |
| Histone H2B type 1-L                                     | H2B1L  | Q99880 | + | - | -                                                                                                                                                                                      |
| Histone H2B type 1-M                                     | H2B1M  | Q99879 | + | - | -                                                                                                                                                                                      |
| Histone H2B type 1-N                                     | H2B1N  | Q99877 | + | - | -                                                                                                                                                                                      |
| Histone H2B type 1-O                                     | H2B1O  | P23527 | + | - | -                                                                                                                                                                                      |
| Histone H2B type 2-E                                     | H2B1E  | Q16778 | + | - | -                                                                                                                                                                                      |
| Histone H2B type 2-F                                     | H2B2F  | Q5QNW6 | + | - | -                                                                                                                                                                                      |
| Histone H2B type F-S                                     | H2B2FS | P57053 | + | - | -                                                                                                                                                                                      |
| Histone H3.1                                             | H3.1   | P68431 | + | - | LARRIRGER                                                                                                                                                                              |
| Histone H3.1t                                            | H31T   | Q16695 | + | - | LARRIRGER                                                                                                                                                                              |
| Histone H3.2                                             | H3.2   | Q71D13 | + | - | LARRIRGER                                                                                                                                                                              |
| Histone H3.3                                             | H3.3   | P84243 | + | - | LARRIRGER                                                                                                                                                                              |
| Histone H4                                               | H4     | P62805 | + | - | MSGRRGGKGG, RRLARRGGVKRI, IYEETRGVLKVF                                                                                                                                                 |
| Histone-binding protein RBBP7                            | RBBP7  | Q16576 | - | - | PDLRLRGGHQKEG                                                                                                                                                                          |
| Importin subunit alpha-2                                 | IMA2   | P52292 | - | - | -                                                                                                                                                                                      |
| Importin subunit beta-1                                  | IMB1   | Q14974 | - | - | -                                                                                                                                                                                      |
| Importin-7                                               | IPO7   | Q95373 | - | - | IIEALRGTMDPA, LQCKRRGGIDQCI                                                                                                                                                            |
| Insulin-like growth factor 2 mRNA-binding protein 1      | IF2B1  | Q9NZI8 | - | + | PENRRGGFGSRGGPQQG                                                                                                                                                                      |





|                                                                         |       |        |   |   |                                                                                                              |
|-------------------------------------------------------------------------|-------|--------|---|---|--------------------------------------------------------------------------------------------------------------|
| Protein AATF                                                            | AATF  | Q9NY61 | - | - | -                                                                                                            |
| Protein C14orf166                                                       | CN166 | Q549M8 | - | - | YKIEDRGNLRNI                                                                                                 |
| Protein FAM102B                                                         | F102B | Q5T813 | - | - | -                                                                                                            |
| Protein FAM111B                                                         | F111B | Q6SJ93 | - | - | GLFYQRGFNVHA                                                                                                 |
| Protein FAM98B                                                          | FA98B | Q52LJ0 | - | - | MRGPEPGP                                                                                                     |
| Protein KIAA0082                                                        | K0082 | Q8N1G2 | - | - | SQKGRRLGLTLRQFDQEL, PYEMIRGVFFLN                                                                             |
| Protein RCC2                                                            | RCC2  | Q9P258 | - | - | AGPRKRGGPAGR, FDFPGRGASQIY                                                                                   |
| Protein SDA1 homolog                                                    | SDA1  | Q9NVU7 | - | - | LQKKFRGKPTFA, SDEEPRGELLSL                                                                                   |
| Pumilio homolog 1                                                       | PUM1  | Q14671 | - | + | QQQVLRRGGASQR, LAERIRGHVLSL, IVAEIRGNVLSL                                                                    |
| Putative ATP-dependent RNA helicase DHX30                               | DHX30 | Q7L2E3 | - | + | PLRDSRGSSEFEM, ELWRRRGPVWQEQ, YVTEGARGARCNV, SKPPSRGGALLF, LHIDARGEPGGI, NVIQRGRGRAGRC, LAELLRGGPCGSF        |
| Putative ATP-dependent RNA helicase DHX57                               | DHX57 | Q6P158 | - | + | GKGSRRGGRRGSHA, DAGSERGLSGEE, NVQLQRGEFVVS, LCTCPRGSRIS                                                      |
| Putative pre-mRNA-splicing factor ATP-dependent RNA helicase DHX15      | DHX15 | O43143 | - | + | DRERDRGDRERE, LPGPKRGVACTQ                                                                                   |
| Putative RNA-binding protein Luc7-like 1                                | LUC7L | Q9NQ29 | - | - | SRSHSRGHRRAS, SGRSERGPPDWR                                                                                   |
| Putative RNA-binding protein Luc7-like 2                                | LC7L2 | Q9Y383 | - | - | -                                                                                                            |
| Putative rRNA methyltransferase 3                                       | RRMJ3 | Q8IY81 | + | + | CDFLARGGSFIT, SLCTIRGHQLE, ELAGVVRGHQGLR, SWEPLRGGKRSRGPKSDD, RPAGVRGHFKVV                                   |
| Pyruvate dehydrogenase E1 component subunit beta                        | ODPB  | P08559 | - | - | KQKIIRGFCHLC, GFTFTRGLSVRE, TDYKRGDFIPG, PPFVVRGANQWI                                                        |
| Pyruvate kinase isozymes M1/M2                                          | KPYM  | P14618 | - | - | GIMVARGDLGIE, QAHLYRGIFPVL, NVGKARGFFKKG                                                                     |
| Ras GTPase-activating protein-binding protein 1                         | G3BP1 | Q13283 | + | + | NIPPQRGPRPIR, RPIMFRGEVRLN, RDNRLRGGPGRGLGGG, LGGGMGRPPRGGMVQK, GFGVGRGLAPR                                  |
| Ras GTPase-activating protein-binding protein 2                         | G3BP2 | Q9UN86 | - | + | PGFPPRGRPRGDMEQN, KPIMFRGEVRLN, RERETRGGGDDR, IRRNDRGPGGPRGIVGGG, RDRDGRGPPRGGMAQK, KLGSRGRTGQME             |
| Ras GTPase-activating-like protein IQGAP1                               | IQA1  | P46940 | - | - | PALGLRGLQQQN, LQARCRGYLVRQ, IQSQWRGYKQKK, VVSFNARGRGNALR                                                     |
| Ras-related protein Rab-35                                              | RAB35 | P15286 | - | - | TSTYYRGTHGVI                                                                                                 |
| Regulator of nonsense transcripts 1                                     | RENT1 | Q92900 | + | + | WFCNRRGNTSGS, GPAARGTPKPK, KGKTRGGGRQKN                                                                      |
| Replication initiator 1                                                 | REPI1 | Q9BWE0 | + | - | LERRCRGPLAMG, LGKESRGLRQQQ, CGQSFRGWVALV, LGPRPRGRPAVT                                                       |
| Rho GTPase-activating protein 1                                         | RHG01 | P20936 | - | - | TLSNERGAQQHV                                                                                                 |
| Ribonuclease P protein subunit p30                                      | RPP30 | P78346 | - | - | DLKALRGLVETA, NVAIDRGLAFEL, RPLEIRGPDVA                                                                      |
| Ribonuclease P protein subunit p40                                      | RPP40 | O75818 | - | - | -                                                                                                            |
| Ribonucleases P/MRP protein subunit POP1                                | POP1  | Q99575 | - | - | GFVADRGVKHS, IPFIYRQVVRGG, SSEDSSRGGRRAP, RRAPGRQQGLT, QPAAQRGLVLLR                                          |
| Ribosomal L1 domain-containing protein 1                                | RL1D1 | O76021 | - | + | HGKKKRRGKAQVK, NPSTPRGKRRKA                                                                                  |
| Ribosomal protein L7-like 1                                             | RL7L  | Q6DK11 | - | - | ELILKRQAKVK, GTPGYRGERINQ                                                                                    |
| RNA 3'-terminal phosphate cyclase                                       | RTC1  | O00442 | - | + | CDIKTRGYYPKG, INLTERGCVTKI, SSLKRGVNRADK                                                                     |
| RNA exonuclease 4                                                       | REXO4 | Q9GZR2 | - | - | DQEASRGSVPSG, DIVPERGDIHKK                                                                                   |
| RNA U small nuclear RNA export adapter protein                          | RNUXA | Q9H814 | - | + | -                                                                                                            |
| RNA-binding protein 26                                                  | RBM26 | Q5T8P6 | - | + | RYNRRRGRSRSY, KGFCMRGDMCPF, LEAAKRGILSSGRRGIHSRGRGAVHGRGRGRGVRPGHA                                           |
| RNA-binding protein 35B                                                 | RB35B | Q9H6T0 | - | + | TVVRARGLPWQS, GLNVARGGVALC, VILRLRGLPFA, DCVRLRGLPYTA                                                        |
| RNA-binding protein 39                                                  | RBM39 | Q14498 | - | + | RDRRFGRYRSP, FNSAIRGKIGLP, TEDMLRGIFEPF                                                                      |
| RNA-binding protein 4                                                   | RBM4  | Q9BWF3 | - | + | AVEAIRGLDNTA                                                                                                 |
| RNA-binding protein Musashi homolog 2                                   | MSI2H | Q96DH6 | - | + | TTKRSRGGFVFT, TTNRRHGFVFT, FPPGTRGRARGLPYTM, VATYGRGYPGA, AVAAARGSGSNP                                       |
| RRP15-like protein                                                      | RRP15 | Q9Y3B9 | - | - | QRIATRGVVQLF, FISVLRGMDGST                                                                                   |
| RRP1-like protein                                                       | RRP1  | P56182 | - | - | LNNITRGIFETI, SEGGERGDALSQ, RLQQRGKGEKE, KRSRRRGVADP, LRDQPRGRGQGRGARQRR                                     |
| RuvB-like 1                                                             | RUVB1 | Q9Y265 | - | - | ITDKLRGEINKV, IFASNRRGNVCIRGTEDIT                                                                            |
| RuvB-like 2                                                             | RUVB2 | Q9Y230 | + | - | AHSHIRGLDLD, IMATNRGITRIRGTSYQS                                                                              |
| Serine hydroxymethyltransferase, mitochondrial precursor                | GLYM  | P34897 | - | - | TGEANRGTWQGE, KDRQCRGLELIA, THKTLRGRASGL, DALLERGYSLVS                                                       |
| Serine/threonine-protein kinase 6                                       | STK6  | O14965 | - | - | -                                                                                                            |
| Serine/threonine-protein phosphatase 2A catalytic subunit alpha isoform | PP2AB | P67775 | - | - | GDYVDRGYYSVE, RITILRGNHESR, SDPDRGGWGIS, WGISPRGAGYTF, DPAPRRGEPHVT                                          |
| Serine/threonine-protein phosphatase 2A catalytic subunit beta isoform  | PP2AA | P62714 | - | - | GDYVDRGYYSVE, RITILRGNHESR, SDPDRGGWGIS, WGISPRGAGYTF, DPAPRRGEPHVT                                          |
| Serine-threonine kinase receptor-associated protein                     | STRAP | Q9Y3F4 | - | - | -                                                                                                            |
| Signal recognition particle 14 kDa protein                              | SRP14 | P37108 | - | + | -                                                                                                            |
| Small nuclear ribonucleoprotein E                                       | RUXE  | P62304 | - | + | MAYRGGQKQV                                                                                                   |
| Small nuclear ribonucleoprotein Sm D2                                   | SMD2  | P62316 | - | - | SKMFLRQDSVIV                                                                                                 |
| Small nuclear ribonucleoprotein-associated protein N                    | RSMN  | P63162 | - | + | GLVLLRGENLVS, GRAAGRGVPAGV, LAGPVRGVGGPS, MTPQGRGTVA, QYPPRGTPTPPP, GLPPARGTPIGM, PPPGIRGPPPPP               |
| Small nuclear ribonucleoprotein-associated proteins B and B'            | RSMB  | P14678 | - | + | GLVLLRGENLVS, GRAAGRGVPAGV, LAGPVRGVGGPS, MTPQGRGTVA, QYPPRGTPTPPP, PPPMGRGAPPPP, GIPPRGTPTMGM, PPPMGRGPPPPP |
| Spectrin alpha chain, brain                                             | SPTA2 | Q13813 | - | - | AASTNRGKDLIG, WINGIRGLVSSD, NADRIRGVIDMG, NSLIERGACAGS, QLAAARGQRLEE                                         |
| Splicing factor 3B subunit 1                                            | SF3B1 | O75533 | - | - | AATPRGDTPGH, TPRTRDGGDSIG, GIRQHRGKGLAA, GRIADRGAEYVS                                                        |
| Splicing factor 3B subunit 2                                            | SF3B2 | Q13435 | + | + | NRPVLRGEGDGD, PVPFRGPPPPP, KPQVRVGVSSS, DSTRSRGSDSPA, YLQKGRGIEKPP, QPQDSRGGSKKY                             |
| Splicing factor 3B subunit 3                                            | SF3B3 | Q15393 | + | + | EIVSVRGKILEL, LDDPERGMIFVC, YVACGRGPRSSL, DELGERGSIGFL, KALWDRGLLNGA                                         |
| Splicing factor 3B subunit 4                                            | SF3B4 | Q15427 | - | + | MGMPRGPFFGS, PPHGMRGPPPLM, PYGYQRGLPPP, PPVPPRGLRGLP                                                         |
| Splicing factor U2AF 35 kDa subunit                                     | U2AF1 | Q01081 | - | + | MGECTRGGFCNF, SRSRDRGGGGGGG                                                                                  |
| Splicing factor, arginine/serine-rich 1                                 | SFRS1 | Q07955 | - | + | GGGVIRGPAGNN, DLKNRRGGPPFA, FPRSGRGTGRGGGGG, GGGAPRGRYGP, SPRRSRGSPPRY                                       |
| Splicing factor, arginine/serine-rich 10                                | TRA2B | P62995 | - | + | QSRRSRGAFAVY, RDIYDRGYDRGYDDRD, YRSYRGGGGGG, SPYYSRGGYRSR                                                    |

|                                                              |       |        |   |   |                                                                                                                           |
|--------------------------------------------------------------|-------|--------|---|---|---------------------------------------------------------------------------------------------------------------------------|
| Splicing factor, arginine/serine-rich 2                      | SFRS2 | Q01130 | - | + | YTKESRGFAFVR, SHHSRRGPPRRR                                                                                                |
| Splicing factor, arginine/serine-rich 3                      | SFRS3 | P84103 | - | + | KRSRNRGPPPSW                                                                                                              |
| Splicing factor, arginine/serine-rich 4                      | SFRS4 | Q08170 | - | + | IVEHARGPRRDG, VEEEKRGVSVRGRSSEQ, ERSRKRGRSKRDS, SQREGRGESENA                                                              |
| Splicing factor, arginine/serine-rich 5                      | SFRS5 | Q13243 | - | + | DIDLKRGFGFVE, ARASRGGGRGRYSDR, EKSQKRGSSRS                                                                                |
| Splicing factor, arginine/serine-rich 6                      | SFRS6 | Q13247 | - | + | IVEHARGPRRDR, KPKSDRGSHTS                                                                                                 |
| Splicing factor, arginine/serine-rich 7                      | SFRS7 | Q16629 | - | + | AEDAVRGLDGKV, SHSRSRGRRYSR, SRSRSGRRRSRS                                                                                  |
| Splicing factor, arginine/serine-rich 9                      | SFRS9 | Q13242 | - | + | GWADERGGEGDG, RTYGGRGGWPRGGRNGP, SRSGSRGRDSPY, SPYQSRGSPHYF                                                               |
| Splicing factor, proline- and glutamine-rich                 | SFPQ  | P23246 | + | + | DRFRSRGGGGGG, GGFHRRGGGGGRGLHDF, GLNQNRGPMGPG, PKPPHRGGGEPRGGROHH, DDTPMRGRQLRV, VIVDDRGRSTGK, GGGQPRGMGPGT, PAGYGRGREEYE |
| Squamous cell carcinoma antigen recognized by T-cells 3      | SART3 | Q15020 | - | + | DSIMTRGNAKYA, KKKKIRGPEKRGAEDEDD, PIFSNRGGDFRGYCYVE, QTYGARKGKRTQ                                                         |
| Stress-70 protein, mitochondrial precursor                   | GRP75 | P38646 | - | - | GAASRSGPTAAR, IPPAPRGVPOIE                                                                                                |
| Structural maintenance of chromosomes protein 3              | SMC3  | Q9UQE7 | - | - | KEKEERGIARLA, YAKQGRGSQFTS, DQVSHRGALTTG, QEELDRGYKSIM, SGESERGGSGSQS                                                     |
| Structural maintenance of chromosomes protein 4              | SMC4  | Q9NTJ3 | - | - | ILNEHRGEKLNLR, AMNRSRQKVLDA                                                                                               |
| Succinyl-CoA ligase [GDP-forming] beta-chain                 | SUCB2 | Q96199 | - | - | ILAGGRGKGVFN                                                                                                              |
| Sucrose nonfermenting protein 2 homolog                      | SMCA5 | O60264 | + | - | RDYQVRGLNWLI, DGILERGAKTA, MAQIERGEARIQ, AEKKRGRPKPST, GAPDGRGRKKKL                                                       |
| Superkiller viralicidal activity 2-like 2                    | SK2L2 | P42285 | + | + | RSMLYRGSEVMR, MRDSERGVVWEE, LPLLKRGIGIHH, GRAGRGMDDRGIVILM                                                                |
| Suppressor of SWI4 1 homolog                                 | SSF1  | Q9NQ55 | - | - | SFVFRGCTGRN, PVGASRGMKLL, QAVAGRGNMRAQ, RWEMDRGRGRLCDQ, GAQARRGPRGASRDG, SRDGGRRGRGRPGKR                                  |
| Surfeit locus protein 6                                      | SURF6 | O75683 | + | + | KIQEARGGGSAK, RLDELRGQDEGK                                                                                                |
| Target of EGR1 protein 1                                     | TOE1  | Q96GM8 | + | + | -                                                                                                                         |
| T-complex protein 1 subunit alpha                            | TCPA  | P17987 | - | - | KYTDIRGQPRYP, ASIILRGANDFM                                                                                                |
| T-complex protein 1 subunit beta                             | TCPB  | P78371 | - | - | CTIVLRGATQI                                                                                                               |
| T-complex protein 1 subunit delta                            | TCPD  | P50991 | - | - | GAAGGRGKAYQ, VTIVVRGSNKL                                                                                                  |
| T-complex protein 1 subunit eta                              | TCPH  | Q99832 | - | - | TTLGPRGMDKLI, LIVDGRGKATIS, CTFILRGGAEQF, PTAAGRGRGRGP                                                                    |
| T-complex protein 1 subunit gamma                            | TCPG  | P49368 | - | - | DSCVLRGVMINK, CTILLRGASKEI                                                                                                |
| T-complex protein 1 subunit theta                            | TCPO  | P50990 | - | - | STIVLRGSDNL                                                                                                               |
| Thyroid receptor-interacting protein 13                      | TRP13 | Q15645 | - | - | VEVHQRGSSTAK                                                                                                              |
| Transcriptional activator protein Pur-alpha                  | PURA  | Q00577 | + | - | LKENQRGRFLRI, RQTVNRGPGLS                                                                                                 |
| Transcriptional activator protein Pur-beta                   | PURB  | Q96QR8 | + | - | DSGSEGGGGGP, FQPASRGGGEQE, LKENQRGRFLRI, RQTVNRGGGGFG, KLYERRGGGSGG                                                       |
| Translation initiation factor eIF-2B subunit delta           | EI2BD | Q9UI10 | - | - | DLQCKRGEHVAL                                                                                                              |
| Tripartite motif-containing protein 25                       | TRI25 | Q14258 | - | - | KASKLRGISTKP                                                                                                              |
| Tripartite motif-containing protein 56                       | TRI56 | Q9BRZ2 | - | - | GPQPHRGGPRNK, GKGASRGLRALV                                                                                                |
| tRNA (cytosine-5)-methyltransferase NSUN2                    | NSUN2 | Q08J23 | - | + | MGRRSRGRRLQ, EGGGKRGEAGWE, LRIATRGAEQLA, VLCGWRGKASIR                                                                     |
| Tubulin alpha-1A chain                                       | TBA1A | Q71U36 | - | - | ANNYARGHYTIG, CCLLYRGDVVPK                                                                                                |
| Tubulin alpha-4A chain                                       | TBA4A | P68366 | - | - | ANNYARGHYTIG, CCLLYRGDVVPK                                                                                                |
| Tubulin beta-2C chain                                        | TBB2C | P68371 | - | - | APLTSRGSQQYR, VAAVFRGRMSMK, CDIPRGLKMSA                                                                                   |
| Tuftelin-interacting protein 11                              | TFP11 | Q9UBB9 | - | - | GYVPGRGLGKNA, ENMAQRGIGVAA, VIYIDRGVVVQ                                                                                   |
| U1 small nuclear ribonucleoprotein 70 kDa                    | RU17  | P08621 | - | + | RSQKPRGYAFIE, LVDVERGRTVKG, LGTRRRGGADVN, RKEELRGGGGDM, DREHKRGERGSRGRDEARGGGGQ                                           |
| U1 small nuclear ribonucleoprotein A                         | SNRPA | P09012 | - | + | RSLKMRGQAFVI                                                                                                              |
| U2 small nuclear ribonucleoprotein A'                        | RU2A  | P09661 | - | + | RELDLRGYKIPV, MFKGKRGAQLAK                                                                                                |
| U2 small nuclear ribonucleoprotein B''                       | RU2B  | P08579 | - | + | KTMKMRGQAFVI, IISKMRGTFADK                                                                                                |
| U3 small nucleolar ribonucleoprotein protein IMP4            | IMP4  | Q96G21 | - | - | AQRMRGRHEVGG, VVHEHRGTPVGL                                                                                                |
| U4/U6 small nuclear ribonucleoprotein Prp3                   | PRPF3 | O43395 | - | - | -                                                                                                                         |
| U4/U6 small nuclear ribonucleoprotein Prp4                   | PRP4  | O43172 | - | - | LLHTLRGHNTNV                                                                                                              |
| U5 small nuclear ribonucleoprotein 200 kDa helicase          | U520  | O75643 | + | + | LLHDDRGPVLEA, EIVLNRGWAQLT, AKTKVRGLIEII                                                                                  |
| Uncharacterized protein C1orf156                             | CA156 | O95568 | - | - | -                                                                                                                         |
| UPF0027 protein C22orf28                                     | CV028 | Q9Y310 | - | - | LRNACRGGGVGG, ARAKRGRLPQLG, IHSGSRGLGHQV                                                                                  |
| UPF0384 protein CGI-117                                      | U384  | Q9Y3C1 | - | - | -                                                                                                                         |
| Zinc finger CCHC type antiviral protein 1                    | ZCC2  | Q7Z2W4 | - | + | CDHFTRGNCRFP, YQSCPGRGVVPFQ, VQMKRGPDPHQ                                                                                  |
| Zinc finger CCHC-type with G patch domain-containing protein | ZGPAT | Q8N5A5 | + | - | APAAAARGSGSET, WEVHTRGIGSRL, AVVLRGKSLDQ, KPPCRGRGARPGG                                                                   |
| Zinc finger CCHC domain-containing protein 8                 | ZCHC8 | Q6NZY4 | + | + | NISTPRGIPDEW, TPPLPRGTPPPV                                                                                                |

total: 389 identified proteins, 216 nucleic acids-binding proteins, 87 identified proteins without RG-box motive
